# Supplementary material for: A new species of Amazonian snouted treefrog (Hylidae: Scinax) with description of a novel species-habitat association for an aquatic breeding frog
Source: PubMed Central journal article supplement (PMC5808318; doi:10.7717/peerj.4321), 2018-02-09
Supplement: peerj-06-4321-s001.pdf [file peerj-06-4321-s001.pdf]

---

|                           |                                                              |
|---------------------------|--------------------------------------------------------------|
| <i>S. baumgardneri</i>    | (Rivero, 1961)                                               |
| <i>S. blairi</i>          | (Fouquette and Pyburn, 1972)                                 |
| <i>S. boesemani</i>       | (Goin, 1966)                                                 |
| <i>S. chiquitanus</i>     | (De la Riva, 1990)                                           |
| <i>S. cruentomma</i>      | (Duellman, 1972)                                             |
| <i>S. danae</i>           | (Duellman, 1986)                                             |
| <i>S. exiguus</i>         | (Duellman, 1986)                                             |
| <i>S. funereus</i>        | (Cope, 1874)                                                 |
| <i>S. fuscomarginatus</i> | (Lutz, 1925)                                                 |
| <i>S. fuscovarius</i>     | (A. Lutz, 1925)                                              |
| <i>S. garbei</i>          | (Miranda-Ribeiro, 1926)                                      |
| <i>S. ictericus</i>       | Duellman and Wiens, 1993                                     |
| <i>S. iquitorum</i>       | Moravec, Tuanama, Pérez and Lehr, 2009                       |
| <i>S. jolyi</i>           | Lescure and Marty, 2000                                      |
| <i>S. karenanneae</i>     | (Pyburn, 1992)                                               |
| <i>S. kennedyi</i>        | (Pyburn, 1973)                                               |
| <i>S. lindsayi</i>        | Pyburn, 1992                                                 |
| <i>S. madeirae</i>        | (Bokermann, 1964)                                            |
| <i>S. nebulosus</i>       | (Spix, 1824)                                                 |
| <i>S. onca</i>            | Ferrão, Moravec, Fraga, Almeida, Kaefer, and Lima, 2017      |
| <i>S. oreites</i>         | Duellman and Wiens, 1993                                     |
| <i>S. pedromedinae</i>    | (Henle, 1991)                                                |
| <i>S. proboscideus</i>    | (Brongersma, 1933)                                           |
| <i>S. rostratus</i>       | (Peters, 1863)                                               |
| <i>S. ruber</i>           | (Laurenti, 1768)                                             |
| <i>S. sateremawe</i>      | Sturaro and Peloso, 2014                                     |
| <i>S. villasboasi</i>     | Brusquetti, Jansen, Barrio-Amorós, Segalla, and Haddad, 2014 |
| <i>S. wandae</i>          | (Pyburn and Fouquette, 1971)                                 |
| <i>S. x-signatus</i>      | (Spix, 1824)                                                 |

---

Supplemental table 1. Species of *Scinax* occurring in Amazonia according Sturaro & Peloso (2014) (and their references) and Ferrão et al. (2016) (and their references).
